RESEARCH ARTICLE

# Understanding Healthcare Workers Self-Reported Practices, Knowledge and Attitude about Hand Hygiene in a Medical Setting in Rural India

Vishal Diwan<sup>1,2,3</sup>\*, Charlotte Gustafsson<sup>1</sup>, Senia Rosales Klintz<sup>1</sup>, Sudhir Chandra Joshi<sup>4</sup>, Rita Joshi<sup>5</sup>, Megha Sharma<sup>1,6</sup>, Harshada Shah<sup>5</sup>, Ashish Pathak<sup>1,7,8</sup>, Ashok J. Tamhankar<sup>1,9</sup>‡, Cecilia Stålsby Lundborg<sup>1</sup>‡

**1** Department of Public Health Sciences, Karolinska Institutet, Stockholm, Sweden, **2** Department of Public Health and Environment, R.D. Gardi Medical College, Ujjain, India, **3** International Center for Health Research, R.D. Gardi Medical College, Ujjain, India, **4** Department of Community Medicine, R.D. Gardi Medical College, Ujjain, India, **5** Department of Microbiology, R.D. Gardi Medical College, Ujjain, India, **6** Department of Pharmacology, R.D. Gardi Medical College, Ujjain, India, **7** Department of Pediatrics, R.D. Gardi Medical College, Ujjain, India, **8** Department of Women and Children's Health, International Maternal and Child Health, Unit, Uppsala University, Uppsala, Sweden, **9** Indian Initiative for Management of Antibiotic Resistance, Department of Environmental Medicine, R.D. Gardi Medical College, Ujjain, India

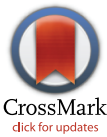

**OPEN ACCESS**

**Citation:** Diwan V, Gustafsson C, Rosales Klintz S, Joshi SC, Joshi R, Sharma M, et al. (2016) Understanding Healthcare Workers Self-Reported Practices, Knowledge and Attitude about Hand Hygiene in a Medical Setting in Rural India. PLoS ONE 11(10): e0163347. doi:10.1371/journal.pone.0163347

**Editor:** Saravana Kumar, University of South Australia, AUSTRALIA

**Received:** October 16, 2015

**Accepted:** September 7, 2016

**Published:** October 6, 2016

**Copyright:** © 2016 Diwan et al. This is an open access article distributed under the terms of the [Creative Commons Attribution License](https://creativecommons.org/licenses/by/4.0/), which permits unrestricted use, distribution, and reproduction in any medium, provided the original author and source are credited.

**Data Availability Statement:** Due to ethical and legal restrictions, all inquiries should be made with The Chairman, Ethics Committee, R.D. Gardi Medical College, Agar Road, Ujjain, India 456006 (Emails: [iecrdgm@yahoo.in](mailto:iecrdgm@yahoo.in), [uctharc@bsnl.in](mailto:uctharc@bsnl.in)), giving all details of the publication. Upon verification of genuineness of the inquiry, the data will be made available.

**Funding:** This study is part of a project funded by the Swedish Research Council (K2007-70X-20514-01-3). VD and MS received an Erasmus Mundus

\* These authors contributed equally to this work.

‡ These authors also contributed equally to this work.

\* [vishaldiwan@hotmail.com](mailto:vishaldiwan@hotmail.com)

## Abstract

### Aim

To describe self-reported practices and assess knowledge and attitudes regarding hand hygiene among healthcare workers in a rural Indian teaching hospital.

### Setting

A rural teaching hospital and its associated medical and nursing colleges in the district of Ujjain, India.

### Method

The study population consisted of physicians, nurses, teaching staff, clinical instructors and nursing students. Self-administered questionnaires based on the World Health Organization Guidelines on Hand Hygiene in Healthcare were used.

### Results

Out of 489 healthcare workers, 259 participated in the study (response rate = 53%). The proportion of healthcare workers that reported to 'always' practice hand hygiene in the selected situations varied from 40–96% amongst categories. Reported barriers to maintaining good hand hygiene were mainly related to high workload, scarcity of resources, lack of

External Co-operation Window Lot 15 India post-doctoral scholarship at Karolinska Institutet. VD received a scholarship from the Swedish Institute. AP received scholarships from Erasmus Mundus External Co-operation Window Lot 15 India and the Swedish Research School for Global Health for doctoral studies at Karolinska Institutet. The funders had no role in study design, data collection and analysis, decision to publish, or preparation of the manuscript.

**Competing Interests:** The authors have declared that no competing interests exist.

scientific information and the perception that priority is not given to hand hygiene, either on an individual or institutional level. Previous training on the topic had a statistically significant association with self-reported practice ( $p = 0.001$ ). Ninety three per cent of the respondents were willing to attend training on hand hygiene in the near future.

## Conclusion

Self-reported knowledge and adherence varied between situations, but hand hygiene practices have the potential to improve if the identified constraints could be reduced. Future training should focus on enhancing healthcare workers' knowledge and understanding regarding the importance of persistent practice in all situations.

## Introduction

Healthcare-associated infections (HAIs) constitute a major threat to patients' and healthcare workers' (HCWs) safety globally [1]. Published evidence shows that hundreds of millions of patients are affected by HAIs annually, with a greater burden in low- and middle-income countries (LMICs) [2]. Consequences of HAIs include: prolonged hospital stay, higher rates of morbidity and mortality, a greater financial burden on health systems, high costs for patients and their families and increased antibiotic resistance (ABR) [1]. ABR implies that infections that were previously curable with antibiotics become difficult or even impossible to treat and thus become life-threatening [3].

Pathogens are frequently transmitted from one patient to another via the hands of HCWs [4]. Thus, hand hygiene (HH) is considered one of the most important components of infection control [4–6]. HH is a general term that refers to hand cleansing actions aimed at preventing colonisation of patients, endogenous and exogenous infection of patients, colonisation of the healthcare environment and HCWs as well as infections of HCWs [1]. Practices can vary between the use of only water, water and soap, water and a medicated (antiseptic) detergent or an alcohol-based hand rub (ABHR) [1,7]. Use of ABHRs requires less time and reduces skin flora more rapidly than washing [7]. Proper implementation of HH significantly reduces the risk of cross-transmission of infections in healthcare facilities [6].

Despite the importance of HH practices, global adherence among HCWs is poor, with an average overall compliance rate less than or around 50% [8–18]. However, compliance with HH practices has been shown to increase significantly following interventional HH programmes [12, 19–23]. Barriers for adherence can be found on the individual, group and institutional levels, for example, level of knowledge and education, allocated resources, working conditions, leadership, commitment and awareness [13].

In 2009, the WHO Guidelines on Hand Hygiene in Health Care were published [1]. A user-centred design approach—'My five moments for hand hygiene'—was developed to enable trainers, observers and HCWs to understand, remember and recognise indications for HH [1, 24].

Many studies have been carried out regarding HH knowledge and practice in hospital infection control, but data is scarce from LMICs [9], including India [6, 25]. The prevention and control of HAIs is given low priority due to a lack of trained manpower, infrastructure and surveillance systems; overcrowded and understaffed hospitals; poor sanitation; lack of clean water; lack of legislation mandating hospital accreditation; and generally poor attitudes and compliance towards basic infection control procedures amongst healthcare providers [6]. The

aim of this study was to explore self-reported practices and assess knowledge and attitude regarding HH among HCWs at a rural teaching hospital and its associated medical and nursing colleges in the district of Ujjain in Central India. Further, we wanted to i) investigate potential gaps between knowledge and reported practice and ii) identify training needs and willingness to participate in training activities.

## Methods

### Setting

The study was conducted at a 570-bedded teaching hospital and its associated medical and nursing colleges in Ujjain in the state of Madhya Pradesh, India. The health indicators of the state are among the poorest in India [26]. The study setting is located outside of Ujjain city. The majority of patients visiting the hospital come from the nearby rural areas.

### Study population and participants

This was a healthcare-setting-based study, and all HCWs and nursing students in the setting were intended to be included. The study population consisted of HCWs (physicians, nurses, clinical instructors and lecturers) at the teaching hospital and the associated medical and nursing colleges as well as undergraduate students at the nursing college. The inclusion criteria were that participants worked at the teaching hospital, were involved with teaching activities at the colleges or were students at the nursing college. A total of 489 HCWs and nursing students were eligible for inclusion in the survey.

### Data collection instruments and data collection

This study was conducted in 2010–2011. The data collection instrument was developed based on the WHO Guidelines on Hand Hygiene in Health Care [1]. Some questions were added based on expert opinions from infection control specialists from the medical college and findings from a previous qualitative study in the same setting [27]. The instruments were pre-tested for face validity before use. Two different questionnaires were constructed: one for respondents having no direct patient contact (NDPC) (S1 Appendix) and the other for respondents working with direct patient contact (DPC) (S2 Appendix). NDPC respondents were physicians working in hospital departments with no direct patient contact, lecturers and clinical instructors at the medical and nursing colleges and undergraduate nursing students at the nursing college. DPC respondents were physicians and nurses working at the teaching hospital. Both NDPC and DPC questionnaires focused on knowledge and attitudes about HH while the DPC questionnaire also contained questions regarding self-reported practices.

The self-administrated questionnaires included mainly closed-ended, multi-item questions. The questionnaires were developed in English and subsequently translated into Hindi and Malayalam. The majority of nursing staff had Malayalam as their first language, there this language was also selected. Before data collection, all participants were given the same formal introduction about the research project and the purpose of the study. The time allotted for filling out the questionnaires ranged between 60–70 minutes.

### Data analyses

Data were first entered into EpiData software (Version 3.1, EpiData Software Association, Odense, Denmark). IBM SPSS Statistics software (Versions 21.0 and 22.0, SPSS Inc., Chicago, IL, USA) was used for analysis. Frequencies and percentages were determined for the categorical and binary variables. For the continuous variables, mean, median, range and standard

deviation (SD) were calculated. Respondents were stratified into four categories for analysis: physicians, physicians enrolled in postgraduate training (hereafter postgraduate residents), nursing college respondents and nurses. Pearson's Chi-Square Exact Sig. (2-sided) tests were performed for variables where stratified groups were used. A one-way between-groups ANOVA using Bonferroni correction was performed to investigate whether there were any statistically significant differences between groups in mean age, mean years of work experience in the hospital and mean years of total work experience.

Missing data varied between items and were removed from the calculations; therefore, the number of respondents is presented for each item.

Items on self-reported practice (DPC respondents), knowledge of when HH should be performed (NDPC respondents) and the assessed risk of transmission of infectious agents (all respondents) were selected for analysis in relation to the concept of 'My five moments for hand hygiene' [1, 24]. This resulted in 14 items from the questionnaires. Additionally, two items were selected regarding glove use. Hence, a total of 16 items were selected for analysis. Six items were categorised under moment 1 ('before touching a patient'), two under moment 2 ('before clean/aseptic procedure'), three under moment 3 ('after body fluid exposure/risk'), two under moment 4 ('after touching a patient') and one under moment 5 ('after touching patient surroundings').

A self-reported practice score in HH was calculated per participant as the sum of the answers 'always' and 'sometimes' to the 16 selected items of the DPC questionnaire. 'Always' was assigned the value of 1, 'sometimes' was assigned the value of 0.5 and a zero value was assigned to 'never'. Responses of 'not applicable' were removed. Similarly, a knowledge score was constructed of selected items ( $n = 16$ ) for NDPC respondents. The score was created to approximate the way in which DPC respondents reported their practice of HH and the knowledge of NDPC respondents regarding when HH should be practiced. It was also created as a parameter to compare possible differences between respondents. Kruskal-Wallis and Mann-Whitney U non-parametric ANOVAs were conducted to test the relationship between the self-reported practice/knowledge scores and study participant group, sex of study participant and whether the respondent had received formal training in HH during the last three years.

## Ethical approval

Ethical approval was granted by the Ethics Committee of the R.D. Gardi Medical College (approval number 114/2010). Informed written consent was obtained from all participants. Confidentiality was guaranteed for written and verbal information. Participation was voluntary.

## Results

Information regarding the demographic characteristics of the study participants is given in [Table 1](#).

The overall response rate was 53% (259/489), and amongst the respondents, 75% ( $n = 259$ ) were from DPC categories. Physicians had a significantly higher mean age ( $p < 0.001$ ), longer work experience at the study hospital ( $p < 0.001$ ) and longer total work experience ( $p < 0.001$ ) compared to the other respondents. The majority of physicians (77%;  $n = 62$ ) had additional specialisation. Postgraduate residents were medical graduates under a three-year residency at the teaching hospital. Among the nursing college faculty group, 30% ( $n = 30$ ) had further specialisation. Thirty per cent ( $n = 30$ ) were nursing graduates while 37% ( $n = 30$ ) were undergraduate nursing students. The majority of members of the nurse group (69%;  $n = 108$ ) had only 10–12 years of basic school education.

**Table 1. Demographic characteristics of the study population in study setting.**

|                                                          | Categories of respondents |                        |                             |                | Total         |
|----------------------------------------------------------|---------------------------|------------------------|-----------------------------|----------------|---------------|
|                                                          | Physicians                | Postgraduate residents | Nursing college respondents | Staff nurses   |               |
| N of respondents                                         | 63                        | 55                     | 30                          | 111            | 259           |
| Male n                                                   | 46                        | 34                     | 8                           | 16             | 104           |
| Female n                                                 | 17                        | 21                     | 22                          | 95             | 155           |
| Median age in years [range]                              | 38 [26–70]                | 27 [23–45]             | 24 [20–63]                  | 22* [19–60]    | 26* [19–70]   |
| Median work experience in this hospital in years [range] | 2.5 [0–11]                | 0.5* [0.3–7.3]         | 1 [0–4.8]                   | 1.5 [0.2–17.6] | 1.4* [0–17.6] |
| Median total work experience in years [range]            | 9 [0–45]                  | 1.3* [0.3–14]          | 2.3 [0–38]                  | 1.5 [0.2–28]   | 2* [0–45]     |
| DPC (N)                                                  | 43                        | 39                     | 0                           | 111            | 193           |
| NDPC (N)                                                 | 20                        | 16                     | 30                          | 0              | 66            |

N = number of respondents of total study population, n = number of respondents of part of study population, DPC = direct patient contact, NDPC = non-direct patient contact,

\*Information is missing for one respondent in these items.

doi:10.1371/journal.pone.0163347.t001

It emerged that 95% (n = 246) of respondents practiced HH ‘for self-protection against infections’, while 94% (n = 247) aimed ‘to prevent spread of infection between patients’. Eighty-one percent (n = 226) of respondents reported that they do it ‘because hands get dirty’. Of the respondents, 29% (n = 254) reported that they had received formal training in HH during the past three years. The proportion of participants that had received formal training varied between respondents: physicians (18%; n = 62), postgraduate residents (18%; n = 55), nursing college respondents (40%; n = 30) and nurses (38%; n = 107). As high as 90% (n = 258) participants thought training was needed while 93% (n = 259) reported they would like to attend training in the near future.

### Self-reported HH practices amongst DPC respondents

The majority of respondents (>50%) reported ‘always’ performing HH in all situations except ‘before any direct patient contact’ and ‘between contact with different patients’ (Table 2). However, reported practices varied among the groups (Table 3). For some items, more than 10% of physicians and postgraduate residents reported they ‘never’ practiced HH. In particular, around 15% of postgraduate residents reported they ‘never’ practiced HH ‘before any direct patient contact’, ‘before contact with patients who have known ABR organism’, ‘before injections and venepuncture’ or ‘before (any) use of gloves’.

The median score of the self-reported HH practice score was 12.5, and the mean was 12 out of a maximum of 16 (n = 186). Respondents who reported they had received formal training in HH in the last three years had an HH practice score statistically significantly higher ( $p = 0.001$ ) than respondents who had not. However, no statistical significance was found when the practice score was tested for association with the group or sex of study participants.

### Knowledge amongst NDPC respondents regarding when HH should be practiced

The overall percentage of NDPC respondents who reported HH should ‘always’ be practiced varied between 77–98% amongst the various items. In regard to ‘after contact with patient’s

**Table 2. Direct patient contact (DPC) respondents' self-reported hand hygiene practices in study setting.**

| Moment                                | Item                                                                                           | Respondents per answer n (%) |           |          | Total n of respondents |
|---------------------------------------|------------------------------------------------------------------------------------------------|------------------------------|-----------|----------|------------------------|
|                                       |                                                                                                | Always                       | Sometimes | Never    |                        |
| Before touching a patient             | 1. Before any direct patient contact*                                                          | 72 (43)                      | 82 (49)   | 15 (9†)  | 169                    |
|                                       | 2. Before care of particularly susceptible patients                                            | 137(81)                      | 26 (15)   | 7 (4)    | 170                    |
|                                       | 3. Before direct contact with patients with known ABR organisms                                | 104 (64)                     | 48 (30)   | 10 (6)   | 162                    |
|                                       | 4. Before contact with wounds                                                                  | 137 (82)                     | 26(16)    | 4 (2)    | 167                    |
|                                       | 5. Between contact with different patients*                                                    | 68 (40)                      | 85 (50)   | 17 (10)  | 170                    |
|                                       | 6. Between contact with different patients in high-risk units (ICU, NICU, surgical wards etc.) | 112 (75)                     | 32 (21)   | 5 (3†)   | 149                    |
| Before clean/aseptic procedure        | 7. Before performing invasive procedures                                                       | 139 (95)                     | 5 (3)     | 3 (2)    | 147                    |
|                                       | 8. Before injections or venepuncture                                                           | 87 (53)                      | 59 (36)   | 17 (10†) | 163                    |
| After body fluid exposure/risk        | 9. After contact with blood, body fluids, wounds, catheter sites or drainage sites             | 165 (93)                     | 10 (6)    | 2 (1)    | 177                    |
|                                       | 10. After visible soiling of hands                                                             | 165 (96)                     | 7 (4)     | -        | 172                    |
|                                       | 11. Between moving from a contaminated to a clean body site of the same patient*               | 106 (63)                     | 48(29)    | 14 (8)   | 168                    |
| After touching a patient              | 12. After contact with patient's intact skin*                                                  | 112 (65)                     | 50 (29)   | 10 (6)   | 172                    |
|                                       | 13. After contact with infectious patients                                                     | 168 (95)                     | 9 (5)     | -        | 177                    |
| After touching patient's surroundings | 14. After contact with inanimate objects in the immediate vicinity of the patient*             | 89 (54)                      | 64 (39)   | 11 (7)   | 164                    |
| Glove use                             | 15. Before using (any) gloves*                                                                 | 100 (58)                     | 53 (31)   | 18 (11)  | 171                    |
|                                       | 16. After glove removal*                                                                       | 150 (86)                     | 22 (13)   | 3 (2†)   | 175                    |

n = number, % = row percentage,

\* = a statistically significant difference in responses across respondent groups ( $p < 0.05$ ),

† = sum of the percentages exceeds or falls below 100% due to rounding

doi:10.1371/journal.pone.0163347.t002

intact skin, 97% of nursing college respondents (n = 30) reported that HH should always be performed. Similar responses were given by 68% of physicians (n = 19) and 88% of postgraduate residents (n = 16).

The median HH knowledge score was 15 and the mean was 14.6 out of a maximum of 16. No statistical significance was found when the score was tested for association with respondents' sex, group or formal HH training in the last three years.

### Assessed risk of transmission of infectious agents amongst all study participants

In regard to the assessed risk of transmission of infectious agents, respondents who assessed a 'high risk' varied between items from 37–94% (Table 4). In all items but two, the majority of respondents assessed the risk of transmission of infectious agents as 'high' rather than 'low' (Table 5).



**Table 3. Self-reported hand hygiene practice according to respondent study groups (DPC respondents) in study setting.**

| Item                                                                          | Respondents per answer n (%) |                        |              | $\chi$<br><i>p</i> -value† |
|-------------------------------------------------------------------------------|------------------------------|------------------------|--------------|----------------------------|
|                                                                               | Physicians                   | Postgraduate residents | Staff Nurses |                            |
| Before any direct patient contact                                             | n = 40                       | n = 39                 | n = 90       | <0.001                     |
| Always                                                                        | 12 (30)                      | 9 (23)                 | 51 (57)      |                            |
| Sometimes                                                                     | 22 (55)                      | 23 (59)                | 37 (41)      |                            |
| Never                                                                         | 6 (15)                       | 7 (18)                 | 2 (2)        |                            |
| Between contact with different patients                                       | n = 40                       | n = 39                 | n = 91       | 0.008                      |
| Always                                                                        | 9 (23)                       | 11 (28)                | 48 (53)      |                            |
| Sometimes                                                                     | 26 (65)                      | 23 (59)                | 36 (40)      |                            |
| Never                                                                         | 5 (13*)                      | 5 (13)                 | 7 (8*)       |                            |
| Between moving from a contaminated to a clean body site of the same patient   | n = 38                       | n = 39                 | n = 91       | <0.001                     |
| Always                                                                        | 24 (63)                      | 14 (36)                | 68 (75)      |                            |
| Sometimes                                                                     | 9 (24)                       | 21 (54)                | 18 (20)      |                            |
| Never                                                                         | 5 (13)                       | 4 (10)                 | 5 (5)        |                            |
| After contact with patient's intact skin                                      | n = 41                       | n = 37                 | n = 94       | <0.001                     |
| Always                                                                        | 15 (37)                      | 15 (41)                | 82 (87)      |                            |
| Sometimes                                                                     | 20 (49)                      | 18 (49)                | 12 (13)      |                            |
| Never                                                                         | 6 (15*)                      | 4 (11*)                | -            |                            |
| After contact with inanimate objects in the immediate vicinity of the patient | n = 37                       | n = 37                 | n = 90       | 0.004                      |
| Always                                                                        | 13 (35)                      | 16 (43)                | 60 (67)      |                            |
| Sometimes                                                                     | 19 (51)                      | 17 (46)                | 28 (31)      |                            |
| Never                                                                         | 5 (14)                       | 4 (11)                 | 2 (2)        |                            |
| Before using (any) gloves                                                     | n = 42                       | n = 38                 | n = 91       | 0.017                      |
| Always                                                                        | 32 (76)                      | 15 (39)                | 53 (58)      |                            |
| Sometimes                                                                     | 7 (17)                       | 16 (42)                | 30 (33)      |                            |
| Never                                                                         | 3 (7)                        | 7 (18*)                | 8 (9)        |                            |
| After glove removal                                                           | n = 41                       | n = 38                 | n = 96       | 0.017                      |
| Always                                                                        | 30 (73)                      | 30 (79)                | 90 (94)      |                            |
| Sometimes                                                                     | 10 (24)                      | 7 (18)                 | 5 (5)        |                            |
| Never                                                                         | 1 (2*)                       | 1 (3)                  | 1 (1)        |                            |

n = total number of respondents per group of respondents, % = column percentage

\* = sum of percentages exceeds or falls below 100 due to rounding

† = *p*-value shows a statistical difference in responses across groups of respondents according to Pearson's Chi-Square Exact Sig. (2-sided) test.

doi:10.1371/journal.pone.0163347.t003

### Barriers for non-compliance with HH practice

The main reported barriers contributing to non-compliance with HH practices amongst all respondents are presented in [Table 6](#).

### Materials used for washing/drying of hands and self-reported frequency of HH practices

In terms of materials used for HH practices, 'Water and soap cake/detergent cake' was found to be the most common material used in all given work places (63–82%), followed by 'Spirit/ABHR', with the highest percentage in the operation theatre (OT), where just over half of all respondents reported using it (54%; n = 74). Optional materials included 'Only water', 'Water and antiseptic solution' and 'Water and liquid soap'. The most common reported practice for

**Table 4. Perceived risk of transmission of infectious agents amongst study population.**

| Moment                                | Item                                                                                            | Respondents per answer n (%) |          |            | Total n of respondents |
|---------------------------------------|-------------------------------------------------------------------------------------------------|------------------------------|----------|------------|------------------------|
|                                       |                                                                                                 | High risk                    | Low risk | Don't know |                        |
| Before touching a patient             | 1. Before any direct patient contact*                                                           | 90 (37)                      | 134 (55) | 21 (9†)    | 245                    |
|                                       | 2. Before care of particularly susceptible patients                                             | 202 (82)                     | 35 (14)  | 9(4)       | 246                    |
|                                       | 3. Before direct contact with patients with known ABR organisms*                                | 152 (64)                     | 69 (29)  | 17 (7)     | 238                    |
|                                       | 4. Before contact with wounds                                                                   | 190 (78)                     | 42 (17)  | 11 (5)     | 243                    |
|                                       | 5. Between contact with different patients*                                                     | 182 (77)                     | 45 (19)  | 10 (4)     | 237                    |
|                                       | 6. Between contact with different patients in high-risk units (ICU, NICU, surgical wards etc.)* | 203 (86)                     | 16 (7)   | 16 (7)     | 235                    |
| Before clean/aseptic procedure        | 7. Before performing invasive procedures*                                                       | 170 (70)                     | 54 (22)  | 19 (8)     | 243                    |
|                                       | 8. Before injections or venepuncture*                                                           | 151 (63)                     | 74 (31)  | 13 (5†)    | 238                    |
| After body fluid exposure/risk        | 9. After contact with blood, body fluids, wounds, catheter sites or drainage sites*             | 204 (84)                     | 32 (13)  | 7 (3)      | 243                    |
|                                       | 10. After visible soiling of hands                                                              | 207 (86)                     | 29 (12)  | 6 (2)      | 242                    |
|                                       | 11. Between moving from a contaminated to a clean body site of the same patient                 | 169 (71)                     | 58 (24)  | 12 (5)     | 239                    |
| After touching a patient              | 12. After contact with patient's intact skin*                                                   | 113 (47)                     | 115 (48) | 10 (4†)    | 238                    |
|                                       | 13. After contact with infectious patients                                                      | 227 (94)                     | 8 (3)    | 6 (2†)     | 241                    |
| After touching patient's surroundings | 14. After contact with inanimate objects in the immediate vicinity of the patient               | 152 (64)                     | 78 (33)  | 8 (3)      | 238                    |
| Glove use                             | 15. Before using (any) gloves                                                                   | 120 (50)                     | 100 (42) | 19 (8)     | 239                    |
|                                       | 16. After glove removal                                                                         | 114 (48)                     | 111 (46) | 15 (6)     | 240                    |

n = number, % = row percentage,

\* = a statistically significant difference in responses between groups of respondents ( $p < 0.05$ ),

† = sum of the percentages exceeds or falls below 100% due to rounding

doi:10.1371/journal.pone.0163347.t004

drying hands after washing was found to be 'Own handkerchief' (57%; n = 144) followed by 'Air dry' (48%; n = 140).

## Discussion

To our knowledge, this is one of the few studies in India exploring the self-reported practices, knowledge and attitude regarding HH amongst HCWs, medical teaching staff and nursing students [28–30]

In this study, the concept of 'My five moments for hand hygiene' formed a framework for identifying and exploring situations in which HH is indicated [1, 24]. The data showed that consistent self-reported compliance with HH practices as recommended by WHO [1] varied between activities and situations as well as within moments (from 40–96%). The majority of respondents reported practicing HH to protect themselves from infection. Similarly, self-protection was expressed as a primary reason for HH practice in a qualitative study of HCWs in the Netherlands [31] and in a multimodal study of nurses, mothers and children in Australia [32]. Another reason given for practicing HH in our study was 'to prevent spread of infection between patients', and more than 80% of respondents reported that they practiced HH 'before care of particularly susceptible patients', 'before performing invasive procedures' or 'before



**Table 5. Perceived risk of transmission of infectious agents according to respondent study groups in study setting.**

| Item                                                                                         | Respondents per answer n (%) |                        |                 |              | $\chi$<br><i>p</i> -value † |
|----------------------------------------------------------------------------------------------|------------------------------|------------------------|-----------------|--------------|-----------------------------|
|                                                                                              | Physicians                   | Postgraduate residents | Nursing college | Staff Nurses |                             |
| Before any direct patient contact                                                            | n = 61                       | n = 55                 | n = 30          | n = 99       | <0.001                      |
| High risk                                                                                    | 28 (46)                      | 23 (42)                | 21 (70)         | 18 (18)      |                             |
| Low risk                                                                                     | 33 (54)                      | 30 (55)                | 8 (27)          | 63 (64)      |                             |
| Don't know                                                                                   | -                            | 2 (4*)                 | 1 (3)           | 18 (18)      |                             |
| Before direct contact with patients with known ABR organisms                                 | n = 59                       | n = 55                 | n = 28          | n = 96       | 0.002                       |
| High risk                                                                                    | 45 (76)                      | 42 (76)                | 18 (64)         | 47 (49)      |                             |
| Low risk                                                                                     | 12 (20)                      | 10 (18)                | 10 (36)         | 37 (39)      |                             |
| Don't know                                                                                   | 2 (3*)                       | 3 (5*)                 | -               | 12 (13*)     |                             |
| Between contact with different patients                                                      | n = 59                       | n = 53                 | n = 27          | n = 98       | 0.015                       |
| High risk                                                                                    | 42 (71)                      | 38 (72)                | 19 (70)         | 83 (85)      |                             |
| Low risk                                                                                     | 15 (25)                      | 14 (26)                | 8 (30)          | 8 (8)        |                             |
| Don't know                                                                                   | 2 (3*)                       | 1 (2)                  | -               | 7 (7)        |                             |
| Between contacts with different patients in high-risk units (ICU, NICU, surgical wards etc.) | n = 59                       | n = 54                 | n = 28          | n = 94       | 0.001                       |
| High risk                                                                                    | 54 (92)                      | 51 (94)                | 26 (93)         | 72(77)       |                             |
| Low risk                                                                                     | 5 (8)                        | 2 (4)                  | 2 (7)           | 7 (7)        |                             |
| Don't know                                                                                   | -                            | 1 (2)                  | -               | 15 (16)      |                             |
| Before performing invasive procedures                                                        | n = 61                       | n = 55                 | n = 30          | n = 97       | <0.001                      |
| High risk                                                                                    | 57 (93)                      | 48 (87)                | 20 (67)         | 45 (46)      |                             |
| Low risk                                                                                     | 4 (7)                        | 5 (9)                  | 9 (30)          | 36 (37)      |                             |
| Don't know                                                                                   | -                            | 2 (4)                  | 1 (3)           | 16 (16*)     |                             |
| Before injections or venepuncture                                                            | n = 59                       | n = 55                 | n = 29          | n = 95       | <0.001                      |
| High risk                                                                                    | 47 (80)                      | 40 (73)                | 22 (76)         | 42 (44)      |                             |
| Low risk                                                                                     | 11 (19)                      | 12 (22)                | 7 (24)          | 44 (46)      |                             |
| Don't know                                                                                   | 1 (2*)                       | 3 (5)                  | -               | 9 (9*)       |                             |
| After contact with blood, body fluids, wounds, catheter sites or drainage sites              | n = 60                       | n = 55                 | n = 30          | n = 98       | <0.001                      |
| High risk                                                                                    | 59 (98)                      | 54 (98)                | 27 (90)         | 64 (65)      |                             |
| Low risk                                                                                     | 1 (2)                        | 1 (2)                  | 2 (7)           | 28 (29)      |                             |
| Don't know                                                                                   | -                            | -                      | 1 (3)           | 6 (6)        |                             |
| After contact with patient's intact skin                                                     | n = 60                       | n = 55                 | n = 29          | n = 94       | 0.001                       |
| High risk                                                                                    | 22 (37)                      | 20 (36)                | 25 (86)         | 46 (49)      |                             |
| Low risk                                                                                     | 35 (58)                      | 33 (60)                | 4 (14)          | 43 (46)      |                             |
| Don't know                                                                                   | 3 (5)                        | 2 (4)                  | -               | 5 (5)        |                             |

n = total number of respondents per group of respondents, % = row percentage

\* = sum of percentages exceeds or falls below 100% due to rounding

† = *p*-value shows a statistical difference in responses across groups of respondents according to Pearson's Chi-Square Exact Sig. (2-sided) test.

doi:10.1371/journal.pone.0163347.t005

contact with wounds'. In a study from Geneva, a high self-reported rate of adherence to HH was defined as performance of HH in 80% or more of all possible situations [33].

Numerous studies have shown that HH practices are employed more frequently 'after' rather than 'before' patient contact [9, 23, 34–38]. This is similar to the variation between items and moments in our study and highlights a self-protective aspect of HH practice amongst HCWs.

**Table 6. Perceived main barriers for non-compliance with hand hygiene amongst study population.**

| Barrier                                                                                                | n (%)    |
|--------------------------------------------------------------------------------------------------------|----------|
| 1. Lack of time (overburdened by work)                                                                 | 239 (73) |
| 2. Irregular water supply                                                                              | 236 (71) |
| 3. Emergency in workplace                                                                              | 237 (70) |
| 4. No facility for hand washing                                                                        | 233 (65) |
| 5. Inaccessible hand washing supplies                                                                  | 235 (63) |
| 6. Lack of active participation in hand hygiene promotion at individual or institutional level         | 232 (49) |
| 7. Lack of institutional safety climate/culture of personal accountability of HCWs                     | 229 (48) |
| 8. Lack of institutional priority for hand hygiene                                                     | 229 (47) |
| 9. Lack of scientific information regarding definitive impact of improved hand hygiene on HCAI rates   | 231 (44) |
| 10. Lack of administrative sanction of non-compliers or rewarding of compliers to perform hand hygiene | 231 (42) |
| 11. Absence of hand washing guidelines in hospital                                                     | 232 (40) |
| 12. Lack of role model from colleagues or superiors                                                    | 234 (34) |

n = number; HCW = healthcare worker; HCAI = healthcare-associated infection

doi:10.1371/journal.pone.0163347.t006

In relation to antibiotic use, human behaviour is influenced by complex processes including factors such as knowledge, attitudes, social norms, socio-economic conditions, peer pressure, experiences and biophysical and socio-behavioural environment [39]. The same complex process could be applicable to HH behaviour.

In a qualitative study in our setting, all participating HCWs were aware of the role their hands play in the transmission of HCAIs, and their level of knowledge on the topic was reported as relatively high. However, the participants reported low adherence to HH practices [27]. The reported barriers were in accordance with the findings of the present study, in which the five most common barriers reported by more than 60% of the respondents were connected to lack of time and scarcity of resources. In a recent study amongst physicians at a tertiary care hospital in West Bengal, patient load and material shortages were reported as the major barriers to HH practices [40]. This is consistent with findings from another LMIC (Pakistan), where a lack of materials was the most commonly reported barrier to HH compliance amongst trainee physicians [9]. Similar to the most commonly reported barrier in our study, observational studies of HCWs in various wards in a European setting and in ICUs in India have demonstrated that highly intense patient care is associated with low compliance with HH practices [8, 15]. The same has been reported for ICU nurses in India [41]; however, the opposite has also been reported [9, 19]. Sax et al. [33] found that the perception that HH is relatively easy to perform was independently associated with high self-reported practice amongst HCWs in Switzerland.

In an observational study of nursing students in the USA, it was discovered that the HH practices of a student's mentor were the strongest predictor of the student's practices; a student

was 70% more likely to engage in HH if the mentor did so [42]. A majority of medical students in Saudi Arabia reported that the behaviour of teachers was the most important factor for HH adherence [43]. Nurses have been found to be more sensitive to the role modelling of senior physicians and administrators than of nurse colleagues [32]. Nurses and nurse assistants have also been found to experience higher pressure from colleagues and superiors than physicians [33]. The population in our study was young, and the majority had little experience working in healthcare. This was particularly evident among postgraduate residents and staff nurses. Similar age characteristics have been reported in teaching hospitals in other LMICs [9, 44]. The largest group of participants in our study included nurses, and most had only basic school education. Physicians had a significantly higher mean age and longer work experience in this particular setting as well as more total experience compared to the other categories of respondents; hence, their experiences and behaviour are important to their younger and inexperienced colleagues. This could provide an incentive for physicians in our setting to increase their HH practices to positively influence their colleagues and students. HH adherence amongst physicians has been found to be associated with a belief that the physicians serve as role models to colleagues [45], and in an earlier study from India, the majority of physicians thought that their behaviour influenced their colleagues [40]. Another study, however, found that the majority of HCWs in ICUs did not believe that their behaviour influenced their colleagues' behaviour, nor did most respondents believe that their colleagues adhered to HH recommendations [15].

A large majority of participants in our study claimed that they practiced HH to prevent the transmission of infectious agents; however, more than 40% of respondents pointed to a lack of scientific information demonstrating that HH prevents the spread of HCAs. Similar disbelief in HH efficacy was expressed in a Dutch study, where physicians stated that their non-compliance was due to a lack of evidence showing that HH counteracts HCAs [31].

Despite the fact that the majority of respondents in our study reported practicing HH to prevent the spread of infections between patients, the assessed risk of transmission varied between groups of respondents. Nurses often reported that they did not know whether a situation was connected to a 'high' or 'low' risk of transmission of infectious agents. Situations in which HCWs perceive a 'high risk' of transmission are likely to be connected with the perception that HH practices are mandatory. For infection risk management by infection control teams, identification, assessment and analysis of 'risks' or unsafe practices and their consequences are based on the potential impact (severity) of an event as well as its likelihood (frequency) [46]. Lack of knowledge, resources, commitment and understanding are aspects that could be targeted to reduce unsafe practices [46].

There was a significant positive association of the HH practice score with formal training in HH. Positive effects on HH compliance from training or exposure to campaigns have been reported in other low- and middle-income settings in Pakistan, India and Turkey [9, 16, 17, 40, 42] as well as in a high-income setting in Europe [33]. However, a follow-up study showed that HH compliance declined two years after the campaigns, implying that repeated training is required [16]. The majority of our respondents reported that they believed training was necessary and they hoped to attend such training in the future.

Nurses have the most opportunities to practice HH in their daily work [8, 15, 18], and since the majority of our staff nurses have no training beyond basic school education, HH training is important to enhance their knowledge on the topic and increase their adherence in situations requiring HH.

For some items related to self-reported practice, the majority of respondents, particularly physicians and postgraduate residents, reported that they perform HH 'sometimes' rather than 'always'. Responses of 'sometimes' might reflect the working conditions in this setting. As noted by Sax et al. [33], self-reported practice does not measure actual adherence. Therefore, it

must be understood that the figures for 'always' might reflect knowledge of when HH should be performed rather than actual behaviour. Additionally, self-reported practice does not provide any information on the quality of the HH practices.

## Methodological considerations

Research from LMICs on HH practice amongst HCWs is scarce. Hence, this study contributes to increasing knowledge on this topic. This kind of survey is a useful step in the overall surveillance of HCAs. Self-reported practice, knowledge and attitudes were reported for HCWs at the rural teaching hospital, the medical college and the nursing college, providing baseline information from those working clinically with or without direct patient contact in this setting.

The study had some limitations. Self-reported practice is an inexpensive approach, but over-reporting of a desired behaviour must be considered when interpreting results [1]. Hopefully, since the respondents were granted confidentiality, the possibility of over-reporting was reduced. Self-reporting has been recognised as a limitation since it does not measure actual adherence to HH practices amongst respondents [33]. However, the results between observations and self-assessment were found to be consistent [47], which suggests self-reporting can be a good indicator of actual practice.

Missing data was found in varying proportions in answers to most questions and their corresponding items. Some respondents did not reply to questions while others chose the answer 'not applicable'.

Even though all HCWs and nursing students were intended to be included in the study population, due primarily to logistical difficulties, the response rate was 53%. It is possible that the participants in this study might have a higher tendency to perform HH or simply find the topic more interesting and important than the non-participating HCWs. The respondents may also be habitual survey responders; therefore, responder bias is possible. Numerical generalizability from this study should not really be done. However, we do consider these hospitals to be relatively representative for many hospitals in India and thus consider the results to be to some extent generalizable in a more qualitative sense, i.e. as we find these results in our study, the situation is likely relatively similar in many other institutions as well.

## Conclusions and Recommendations

Examining the self-reported HH practices in our study setting and applying the concept of 'My five moments for hand hygiene', it is evident that there are gaps in understanding HH in this study setting. Even though HH is reportedly performed to a great extent in certain situations, and while knowledge of when it should be performed is high, HH is not practiced in all situations dictated by WHO guidelines. Similar to results from other studies in India and other LMICs, HCWs in this setting report being overburdened by work and that essential resources required to perform HH are scarce. To enhance HH compliance in our setting, materials must be supplied and institutional and administrative involvement needs to be increased. Future training in HH must be designed not only to influence behaviour change but also to enhance the understanding of how persistent practices in all situations have a long-term impact on reducing HCAs and ABR. This study provides a baseline for an intervention study conducted in this teaching hospital setting and serves as a platform for future interventions and evaluations. If self-reported practice is interpreted as awareness or understanding of when HH should be practiced, and hence reflects this awareness rather than actual practice, it would also be beneficial to conduct observational studies to determine adherence to HH practices. A suggestion might be to establish patient involvement in this setting in the future. By empowering patients, they will also come to understand the necessity of HH practices and encourage their healthcare

providers and visitors to acknowledge HH, contributing to reducing the cross-transmission of infectious agents in healthcare facilities.

## Supporting Information

### S1 Appendix.

(PDF)

### S2 Appendix.

(PDF)

## Author Contributions

**Conceived and designed the experiments:** VD CSL AP MS HS SCJ RJ AJT.

**Performed the experiments:** SCJ VD RJ HS MS AP.

**Analyzed the data:** CG VD SRK CSL AJT.

**Contributed reagents/materials/analysis tools:** CG VD SRK CSL AJT.

**Wrote the paper:** CG VD SRK AJT CSL.

## References

1. World Health Organization. WHO guidelines on hand hygiene in health care: First global patient safety challenge: Clean care is safer care [Internet]. Geneva: World Health Organization; 2009 [cited 2013 Sep 24]. Available from: [http://whqlibdoc.who.int/publications/2009/9789241597906\\_eng.pdf](http://whqlibdoc.who.int/publications/2009/9789241597906_eng.pdf)
2. World Health Organization. Report on the burden of endemic health care-associated infection worldwide: Clean care is safer care [Internet]. Geneva: World Health Organization; 2011 [cited 2013 Apr 3]. Available from: [http://whqlibdoc.who.int/publications/2011/9789241501507\\_eng.pdf](http://whqlibdoc.who.int/publications/2011/9789241501507_eng.pdf)
3. World Health Organization. The evolving threat of antimicrobial resistance: Options for action [Internet]. Geneva: World Health Organization; 2012 [cited 2013 Jan 10]. Available from: [http://whqlibdoc.who.int/publications/2012/9789241503181\\_eng.pdf](http://whqlibdoc.who.int/publications/2012/9789241503181_eng.pdf)
4. Pittet D, Allegranzi B, Sax H, Dharan S, Pessoa-Silva CL, Donaldson L, et al. Evidence-based model for hand transmission during patient care and the role of improved practices. *Lancet Infect Dis*. 2006 Oct; 6(10):641–52. doi: [10.1016/S1473-3099\(06\)70600-4](https://doi.org/10.1016/S1473-3099(06)70600-4) PMID: [17008173](https://pubmed.ncbi.nlm.nih.gov/17008173/)
5. Burke JP. Infection control—a problem for patient safety. *N Engl J Med*. 2003 Feb 13; 348(7):651–6. doi: [10.1056/NEJMp020557](https://doi.org/10.1056/NEJMp020557) PMID: [12584377](https://pubmed.ncbi.nlm.nih.gov/12584377/)
6. Mathur P. Hand hygiene: back to the basics of infection control. *Indian J Med Res*. 2011 Nov; 134(5):611–20. doi: [10.4103/0971-5916.90985](https://doi.org/10.4103/0971-5916.90985) PMID: [22199099](https://pubmed.ncbi.nlm.nih.gov/22199099/)
7. Rotter ML. Hand washing and hand disinfection. In: Mayhall CG, editor. *Hospital Epidemiology and Infection Control*. 2nd ed. Philadelphia, PA: Lippincott, Williams & Wilkins; 1999:1339–55.
8. Pittet D, Mourouga P, Perneger TV. Compliance with handwashing in a teaching hospital. *Infection Control Program*. *Ann Intern Med*. 1999 Jan 19; 130(2):126–30. PMID: [10068358](https://pubmed.ncbi.nlm.nih.gov/10068358/)
9. Anwar MA, Rabbi S, Masroor M, Majeed F, Andrades M, Baqi S. Self-reported practices of hand hygiene among the trainees of a teaching hospital in a resource limited country. *J Pak Med Assoc*. 2009; 59(9):631–4. PMID: [19750862](https://pubmed.ncbi.nlm.nih.gov/19750862/)
10. Daniels IR, Rees BI. Handwashing: simple, but effective. *Ann R Coll Surg Engl*. 1999; 81(2):117–8. PMID: [10364970](https://pubmed.ncbi.nlm.nih.gov/10364970/)
11. Cohen B, Saiman L, Cimiotti J, Larson E. Factors associated with hand hygiene practices in two neonatal intensive care units. *Pediatr Infect Dis J*. 2003; 22(6):494–9. doi: [10.1097/01.inf.0000069766.86901.91](https://doi.org/10.1097/01.inf.0000069766.86901.91) PMID: [12799504](https://pubmed.ncbi.nlm.nih.gov/12799504/)
12. Lam BC, Lee J, Lau YL. Hand hygiene practices in a neonatal intensive care unit: a multimodal intervention and impact on nosocomial infection. *Pediatrics*. 2004 Nov; 114(5):565–71. doi: [10.1542/peds.2004-1107](https://doi.org/10.1542/peds.2004-1107) PMID: [15492360](https://pubmed.ncbi.nlm.nih.gov/15492360/)
13. Pittet D. Improving compliance with hand hygiene in hospitals. *Infect Control Hosp Epidemiol*. 2000 Jun; 21(6):381–6. doi: [10.1086/501777](https://doi.org/10.1086/501777) PMID: [10879568](https://pubmed.ncbi.nlm.nih.gov/10879568/)

14. Wendt C, Knautz D, von Baum H. Differences in hand hygiene behavior related to the contamination risk of healthcare activities in different groups of healthcare workers. *Infect Control Hosp Epidemiol*. 2004 Mar; 25(3):203–6. doi: [10.1086/502378](https://doi.org/10.1086/502378) PMID: [15061410](https://pubmed.ncbi.nlm.nih.gov/15061410/)
15. Sharma S, Puri S, Whig J. Hand hygiene compliance in the intensive care units of a tertiary care hospital. *Indian J Community Med*. 2011; 36(3):217–21. doi: [10.4103/0970-0218.86524](https://doi.org/10.4103/0970-0218.86524) PMID: [22090677](https://pubmed.ncbi.nlm.nih.gov/22090677/)
16. Biswal M, Rajpoot S, Dhaliwal N, Appanavar SB, Taneja N, Gupta AK. Evaluation of the short-term and long-term effect of a short series of hand hygiene campaigns on improving adherence in a tertiary care hospital in India. *Am J Infect Control*. 2014; 42(9):1009–10. doi: [10.1016/j.ajic.2014.05.025](https://doi.org/10.1016/j.ajic.2014.05.025) PMID: [25179336](https://pubmed.ncbi.nlm.nih.gov/25179336/)
17. Biswal M, Singh NV, Kaur R, Sebastian T, Dolkar R, Appanavar SB, et al. Adherence to hand hygiene in high-risk units of a tertiary care hospital in India. *Am J Infect Control*. 2013; 41(11):1114–5. doi: [10.1016/j.ajic.2013.05.026](https://doi.org/10.1016/j.ajic.2013.05.026) PMID: [24176772](https://pubmed.ncbi.nlm.nih.gov/24176772/)
18. Salmon S, Tran HL, Bui DP, Pittet D, McLaws ML. Beginning the journey of hand hygiene compliance monitoring at a 2,100-bed tertiary hospital in Vietnam. *Am J Infect Control*. 2014; 42(1):71–3. doi: [10.1016/j.ajic.2013.07.011](https://doi.org/10.1016/j.ajic.2013.07.011) PMID: [24388472](https://pubmed.ncbi.nlm.nih.gov/24388472/)
19. Creedon SA. Health care workers' hand decontamination practices: an Irish study. *Clin Nurs Res*. 2006 Feb; 15(1):6–26. doi: [10.1177/1054773805282445](https://doi.org/10.1177/1054773805282445) PMID: [16410620](https://pubmed.ncbi.nlm.nih.gov/16410620/)
20. Pittet D, Hugonnet S, Harbarth S, Mourouga P, Sauvan V, Touveneau S, et al. Effectiveness of a hospital-wide programme to improve compliance with hand hygiene. *Infection Control Programme*. *Lancet*. 2000 Oct; 356(9205):1307–12.
21. Allegranzi B, Sax H, Bengaly L, Richet H, Minta DK, Chraïti MN, et al. Successful implementation of the World Health Organization hand hygiene improvement strategy in a referral hospital in Mali, Africa. *Infect Control Hosp Epidemiol*. 2010; 31(2):133–41. doi: [10.1086/649796](https://doi.org/10.1086/649796) PMID: [20017633](https://pubmed.ncbi.nlm.nih.gov/20017633/)
22. Chakravarthy M, Myatra SN, Rosenthal VD, Udadia FE, Gokul BN, Divatia JV, et al. The impact of the International Nosocomial Infection Control Consortium (INICC) multicenter, multidimensional hand hygiene approach in two cities of India. *J Infect Public Health*. 2014. doi: [10.1016/j.jiph.2014.08.004](https://doi.org/10.1016/j.jiph.2014.08.004) PMID: [25270387](https://pubmed.ncbi.nlm.nih.gov/25270387/)
23. Mahfouz AA, Al-Zaydani IA, Abdelaziz AO, El-Gamal MN, Assiri AM. Changes in hand hygiene compliance after a multimodal intervention among health-care workers from intensive care units in South-western Saudi Arabia. *J Epidemiol Glob Health*. 2014; 4(4):315–21. doi: [10.1016/j.jegh.2014.05.002](https://doi.org/10.1016/j.jegh.2014.05.002) PMID: [25455649](https://pubmed.ncbi.nlm.nih.gov/25455649/)
24. Sax H, Allegranzi B, Uckay I, Larson E, Boyce J, Pittet D. 'My five moments for hand hygiene': a user-centred design approach to understand, train, monitor and report hand hygiene. *J Hosp Infect*. 2007; 67(1):9–21. doi: [10.1016/j.jhin.2007.06.004](https://doi.org/10.1016/j.jhin.2007.06.004) PMID: [17719685](https://pubmed.ncbi.nlm.nih.gov/17719685/)
25. Mathai E, Allegranzi B, Kilpatrick C, Pittet D. Prevention and control of health care-associated infections through improved hand hygiene. *Indian J Med Microbiol*. 2010 Apr-Jun; 28(2):100–6. doi: [10.4103/0255-0857.62483](https://doi.org/10.4103/0255-0857.62483) PMID: [20404452](https://pubmed.ncbi.nlm.nih.gov/20404452/)
26. De Costa A, Diwan V. 'Where is the public health sector?' Public and private sector healthcare provision in Madhya Pradesh, India. *Health Policy*. 2007; 84(2–3):269–76. doi: [10.1016/j.healthpol.2007.04.004](https://doi.org/10.1016/j.healthpol.2007.04.004) PMID: [17540472](https://pubmed.ncbi.nlm.nih.gov/17540472/)
27. Joshi SC, Diwan V, Tamhankar AJ, Joshi R, Shah H, Sharma M, et al. Qualitative study on perceptions of hand hygiene among hospital staff in a rural teaching hospital in India. *J Hosp Infect*. 2012 Apr; 80(4):340–4. doi: [10.1016/j.jhin.2011.12.017](https://doi.org/10.1016/j.jhin.2011.12.017) PMID: [22321723](https://pubmed.ncbi.nlm.nih.gov/22321723/)
28. Anargh V, Singh H, Kotwal A, Kulakrni A, Kotwal Atul, Mahen A. Hand Hygiene practices among healthcare workers in a tertiary care facility in Pune. *MJAFI*. 2013; 69(1): 54–56. doi: [10.1016/j.mjafi.2012.08.011](https://doi.org/10.1016/j.mjafi.2012.08.011) PMID: [24532935](https://pubmed.ncbi.nlm.nih.gov/24532935/)
29. Ayub A, Goel A, Kotwal A, Kulkarni A, Kotwal A, Mahen A. Infection Control Practices in health care: Teaching and learning requirements of medical undergraduates. *MJAFI* 2013; 69(2): 107–112. doi: [10.1016/j.mjafi.2012.07.021](https://doi.org/10.1016/j.mjafi.2012.07.021) PMID: [24600081](https://pubmed.ncbi.nlm.nih.gov/24600081/)
30. Nair SS, Hanumantappa R, Hiremath SG, Siraj MA, Raghunath P. Knowledge, Attitude, and Practice of Hand Hygiene among Medical and Nursing Students at a Tertiary Health Care Centre in Raichur, India. *ISRN Prev Med*. 2014; 608927. doi: [10.1155/2014/608927](https://doi.org/10.1155/2014/608927) PMID: [24967144](https://pubmed.ncbi.nlm.nih.gov/24967144/)
31. Erasmus V, Brouwer W, van Beeck EF, Oenema A, Daha TJ, Richardus JH, et al. A qualitative exploration of reasons for poor hand hygiene among hospital workers: lack of positive role models and of convincing evidence that hand hygiene prevents cross-infection. *Infect Control Hosp Epidemiol*. 2009; 30(5):415–9. doi: [10.1086/596773](https://doi.org/10.1086/596773) PMID: [19344264](https://pubmed.ncbi.nlm.nih.gov/19344264/)
32. Whitby M, McLaws ML, Ross MW. Why healthcare workers don't wash their hands: a behavioral explanation. *Infect Control Hosp Epidemiol*. 2006; 27(5):484–92. doi: [10.1086/503335](https://doi.org/10.1086/503335) PMID: [16671030](https://pubmed.ncbi.nlm.nih.gov/16671030/)



33. Sax H, Uckay I, Richet H, Allegranzi B, Pittet D. Determinants of good adherence to hand hygiene among healthcare workers who have extensive exposure to hand hygiene campaigns. *Infect Control Hosp Epidemiol.* 2007; 28(11):1267–74. doi: [10.1086/521663](https://doi.org/10.1086/521663) PMID: [17926278](https://pubmed.ncbi.nlm.nih.gov/17926278/)
34. Chacko LK. Knowledge of hand hygiene and its self reported practice among nursing students during clinical experience at a teaching hospital in Mangalore. *Journal of Patient Safety & Infection Control.* 2014; 2:55–57. doi: [10.1016/j.jpsic.2014.06.006](https://doi.org/10.1016/j.jpsic.2014.06.006)
35. Harris AD, Samore MH, Nafziger R, DiRosario K, Roghmann MC, Carmeli Y. A survey on handwashing practices and opinions of healthcare workers. *J Hosp Infect.* 2000; 45(4):318–21. doi: [10.1053/jhin.2000.0781](https://doi.org/10.1053/jhin.2000.0781) PMID: [10973750](https://pubmed.ncbi.nlm.nih.gov/10973750/)
36. Chavali S, Menon V, Shukla U. Hand hygiene compliance among healthcare workers in an accredited tertiary care hospital. *Indian J Crit Care Med.* 2014; 18(10):689–93. doi: [10.4103/0972-5229.142179](https://doi.org/10.4103/0972-5229.142179) PMID: [25316980](https://pubmed.ncbi.nlm.nih.gov/25316980/)
37. Jenner EA, Fletcher BC, Watson P, Jones FA, Miller L, Scott GM. Discrepancy between self-reported and observed hand hygiene behaviour in healthcare professionals. *J Hosp Infect.* 2006; 63(4):418–22. doi: [10.1016/j.jhin.2006.03.012](https://doi.org/10.1016/j.jhin.2006.03.012) PMID: [16772101](https://pubmed.ncbi.nlm.nih.gov/16772101/)
38. Lankford MG, Zembower TR, Trick WE, Hacek DM, Noskin GA, Peterson LR. Influence of role models and hospital design on hand hygiene of healthcare workers. *Emerg Infect Dis.* 2003; 9(2):217–23. doi: [10.3201/eid0902.020249](https://doi.org/10.3201/eid0902.020249) PMID: [12603993](https://pubmed.ncbi.nlm.nih.gov/12603993/)
39. Stålsby Lundborg C, Tamhankar AJ. Understanding and changing human behaviour—antibiotic mainstreaming as an approach to facilitate modification of provider and consumer behaviour. *Ups J Med Sci.* 2014; 119(2):125–33 doi: [10.3109/03009734.2014.905664](https://doi.org/10.3109/03009734.2014.905664) PMID: [24735112](https://pubmed.ncbi.nlm.nih.gov/24735112/)
40. Biswas P, Chatterjee S. Hand hygiene compliance among doctors in a tertiary care hospital of India [Scientific letter]. *Indian J Pediatr.* 2013 Jul 19. doi: [10.1007/s12098-013-1150-4](https://doi.org/10.1007/s12098-013-1150-4) PMID: [23868539](https://pubmed.ncbi.nlm.nih.gov/23868539/)
41. Mathur P, Jain N, Gupta A, Gunjiyal J, Nair S, Misra MC. Hand hygiene in developing nations: experience at a busy level-1 trauma center in India [Letter to the editor]. *Am J Infect Control.* 2011 Oct; 39(8):705–6. doi: [10.1016/j.ajic.2011.01.017](https://doi.org/10.1016/j.ajic.2011.01.017) PMID: [21775018](https://pubmed.ncbi.nlm.nih.gov/21775018/)
42. Snow M, White GL Jr., Alder SC, Stanford JB. Mentor's hand hygiene practices influence student's hand hygiene rates. *Am J Infect Control.* 2006; 34(1):18–24. doi: [10.1016/j.ajic.2005.05.009](https://doi.org/10.1016/j.ajic.2005.05.009) PMID: [16443088](https://pubmed.ncbi.nlm.nih.gov/16443088/)
43. Salati Sajad A, Al Kadi A. Hand hygiene practices in medical students: a follow-up study. *International Scholarly Research Notices.* 2014 doi: [10.1155/2014/591879](https://doi.org/10.1155/2014/591879) PMID: [27379324](https://pubmed.ncbi.nlm.nih.gov/27379324/)
44. Alp E, Ozturk A, Guven M, Celik I, Doganay M, Voss A. Importance of structured training programs and good role models in hand hygiene in developing countries. *J Infect Public Health.* 2011; 4(2):80–90. doi: [10.1016/j.jiph.2011.03.001](https://doi.org/10.1016/j.jiph.2011.03.001) PMID: [21663877](https://pubmed.ncbi.nlm.nih.gov/21663877/)
45. Pittet D, Simon A, Hugonnet S, Pessoa-Silva CL, Sauvan V, Perneger TV. Hand hygiene among physicians: performance, beliefs, and perceptions. *Ann Intern Med.* 2004; 141(1):1–8. doi: [10.7326/0003-4819-141-1-200407060-00008](https://doi.org/10.7326/0003-4819-141-1-200407060-00008) PMID: [15238364](https://pubmed.ncbi.nlm.nih.gov/15238364/)
46. Damani N. Risk Management. In: Friedman C, Newson W, editors. *IFIC basic concepts of infection control.* Portadown: International Federation of Infection Control [Internet]; 2011:361–70 [cited 2013 Nov 13]. Available from: [http://www.theific.org/basic\\_concepts/IFIC%20Book.pdf](http://www.theific.org/basic_concepts/IFIC%20Book.pdf).
47. Moret L, Tequi B, Lombraill P. Should self-assessment methods be used to measure compliance with handwashing recommendations? A study carried out in a French university hospital. *Am J Infect Control.* 2004; 32(7):384–90. doi: [10.1016/S0196655304004456](https://doi.org/10.1016/S0196655304004456) PMID: [15525912](https://pubmed.ncbi.nlm.nih.gov/15525912/)
